# Supplementary material for: Antinociceptive Effect of the Essential Oil Obtained from the Leaves ofCroton cordiifoliusBaill. (Euphorbiaceae) in Mice
Source: Hindawi journal article supplement (doi:10.1155/2015/620865), 2015-01-01

## Supplementary Information

**Figure S1.** Gas Chromatography-Mass Spectroscopy analysis of *Croton cordifolius* essential oil. **a.** GC-MS chromatogram, **b.** GC-MS peak report.

**a.**

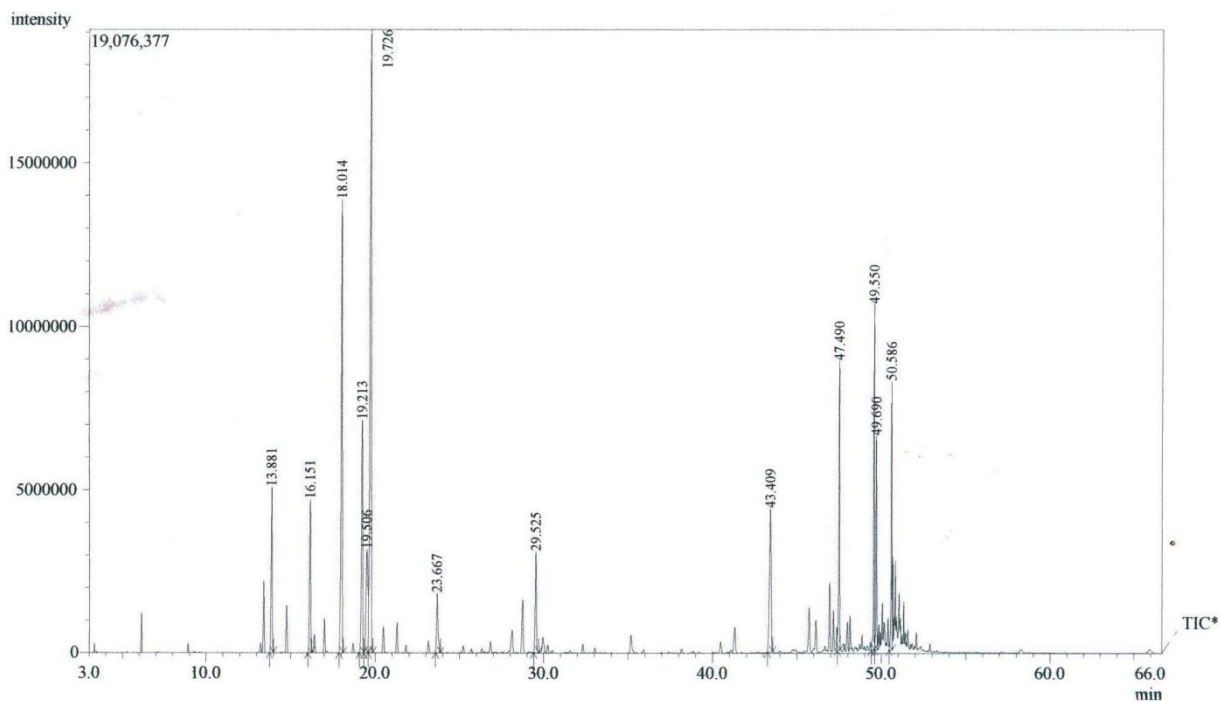

**b.**

| Peak# | R.Time | Area      | Height   | A/H  | Mark | Name | Base m/z | Area%  |
|-------|--------|-----------|----------|------|------|------|----------|--------|
| 1     | 13.881 | 22835927  | 5074978  | 4.50 |      |      | 93.10    | 4.96   |
| 2     | 16.151 | 21553164  | 4696630  | 4.59 |      |      | 93.10    | 4.68   |
| 3     | 18.014 | 71010347  | 13864954 | 5.12 |      |      | 93.10    | 15.43  |
| 4     | 19.213 | 36886692  | 7129365  | 5.17 |      |      | 119.10   | 8.02   |
| 5     | 19.506 | 24007099  | 3166689  | 7.58 | V    |      | 68.05    | 5.22   |
| 6     | 19.726 | 115469228 | 19063348 | 6.06 | V    |      | 43.05    | 25.09  |
| 7     | 23.667 | 10748453  | 1819513  | 5.91 |      |      | 71.05    | 2.34   |
| 8     | 29.525 | 15690775  | 3094592  | 5.07 |      |      | 59.05    | 3.41   |
| 9     | 43.409 | 30270014  | 4386903  | 6.90 |      |      | 93.10    | 6.58   |
| 10    | 47.490 | 33865220  | 8842316  | 3.83 | V    |      | 121.15   | 7.36   |
| 11    | 49.550 | 30760973  | 10571234 | 2.91 | V    |      | 43.05    | 6.68   |
| 12    | 49.690 | 21700540  | 6553023  | 3.31 | V    |      | 43.05    | 4.72   |
| 13    | 50.586 | 25358173  | 8231568  | 3.08 | V    |      | 161.15   | 5.51   |
|       |        | 460156605 | 96495113 |      |      |      |          | 100.00 |

**Figure S2.**  $^{13}\text{C}$  NMR spectrum of the essential oil of *Croton cordifolius* (CDCl<sub>3</sub>, 75MHz).

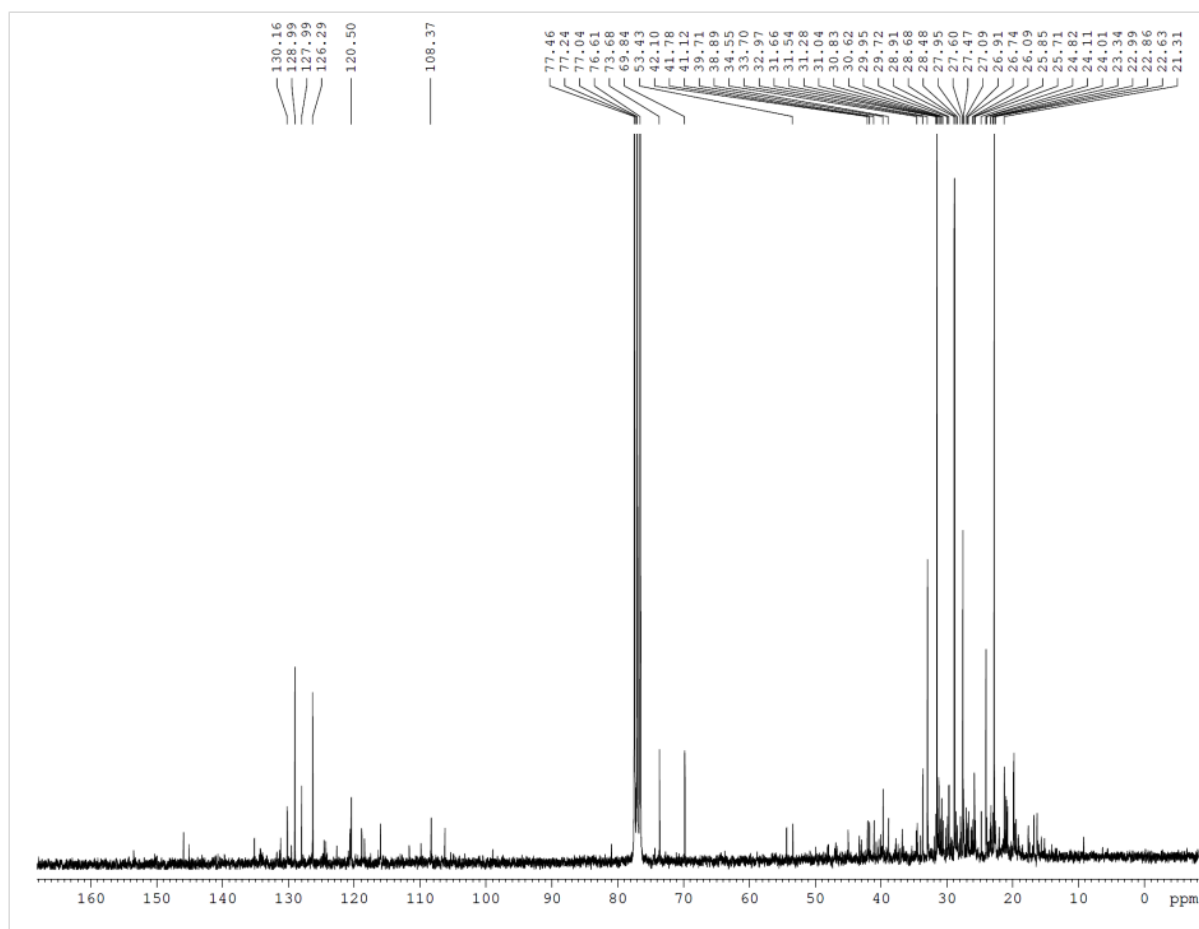

**Figure S3.**  $^1\text{H}$  NMR spectrum of the essential oil of *Croton cordiifolius* ( $\text{CDCl}_3$ , 300 MHz).

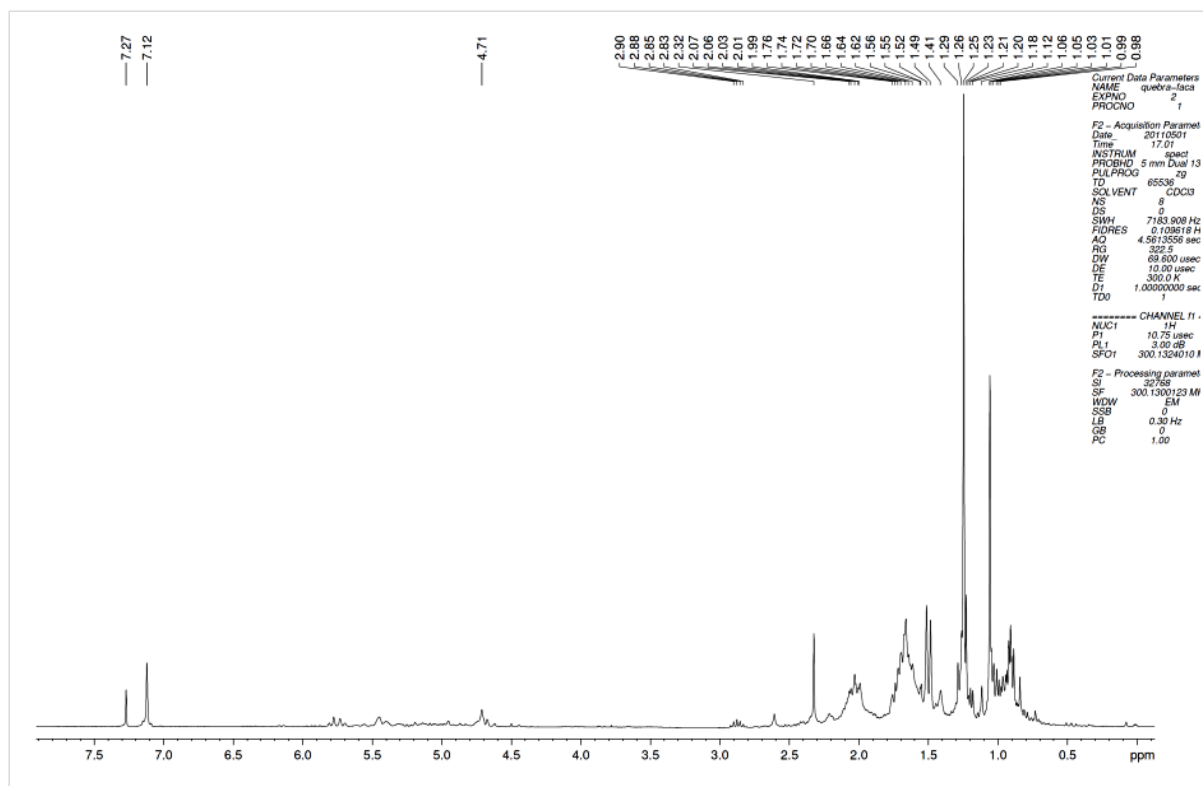

Supplement: f1 [file 620865.f1.pdf]
